# Supplementary material
Source: Springer Nature journal article supplement (https://www.springermedizin.de/resource/supplementary/13058_2004_912_MOESM2_ESM.pdf/9705626)

**(a)** Nuclear p14<sup>ARF</sup> and nuclear Hdm2

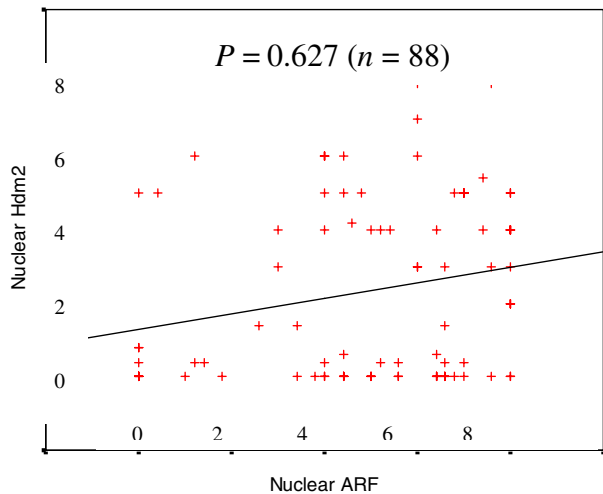

**(b)** Nuclear p14<sup>ARF</sup> and cytoplasmic Hdm2

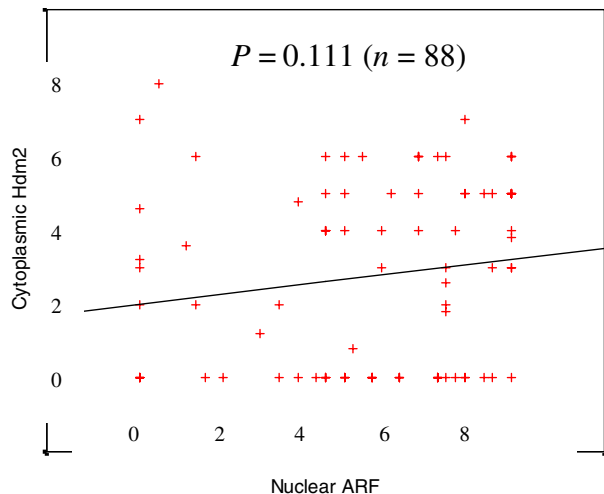

**(c)** Cytoplasmic p14<sup>ARF</sup> and nuclear

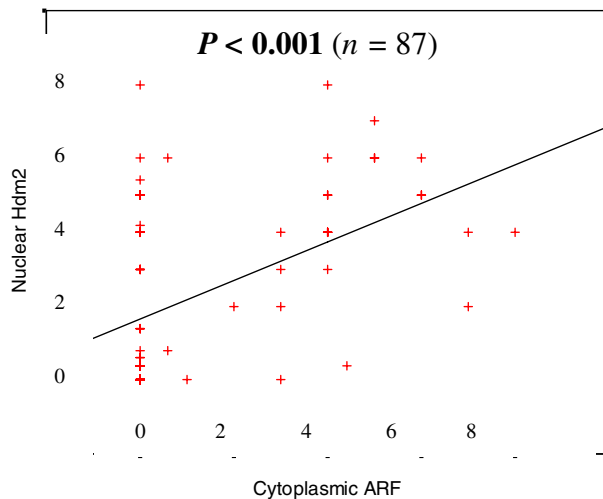

**(d)** Cytoplasmic p14<sup>ARF</sup> and cytoplasmic

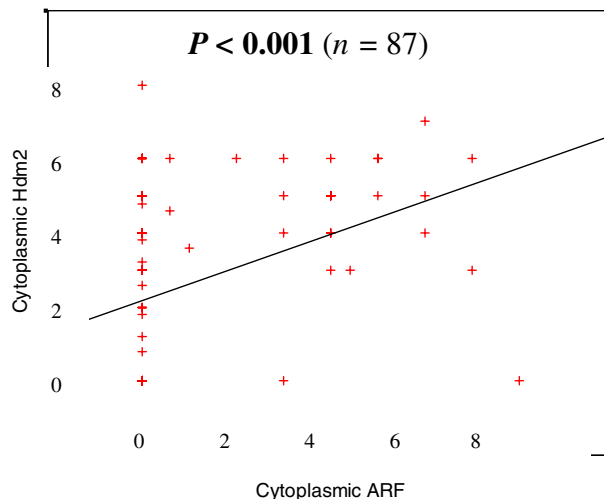

Supplement: MOESM2 [file 9705626]
